# Supplementary material for: Measurement of Elastic Modulus of Collagen Type I Single Fiber
Source: PubMed Central journal article supplement (PMC4723153; doi:10.1371/journal.pone.0145711), 2016-01-22
Supplement: pone.0145711.s002.pdf [file pone.0145711.s002.pdf]

## S2 Check for the consistency of the radius along the fiber

To ensure that the radius of the fiber does not change along its length, we scanned a long (75  $\mu\text{m}$ ) section of a dried fiber attached to a glass substrate (Figure B). Small objects surrounding the fiber are crystals of dried buffer.

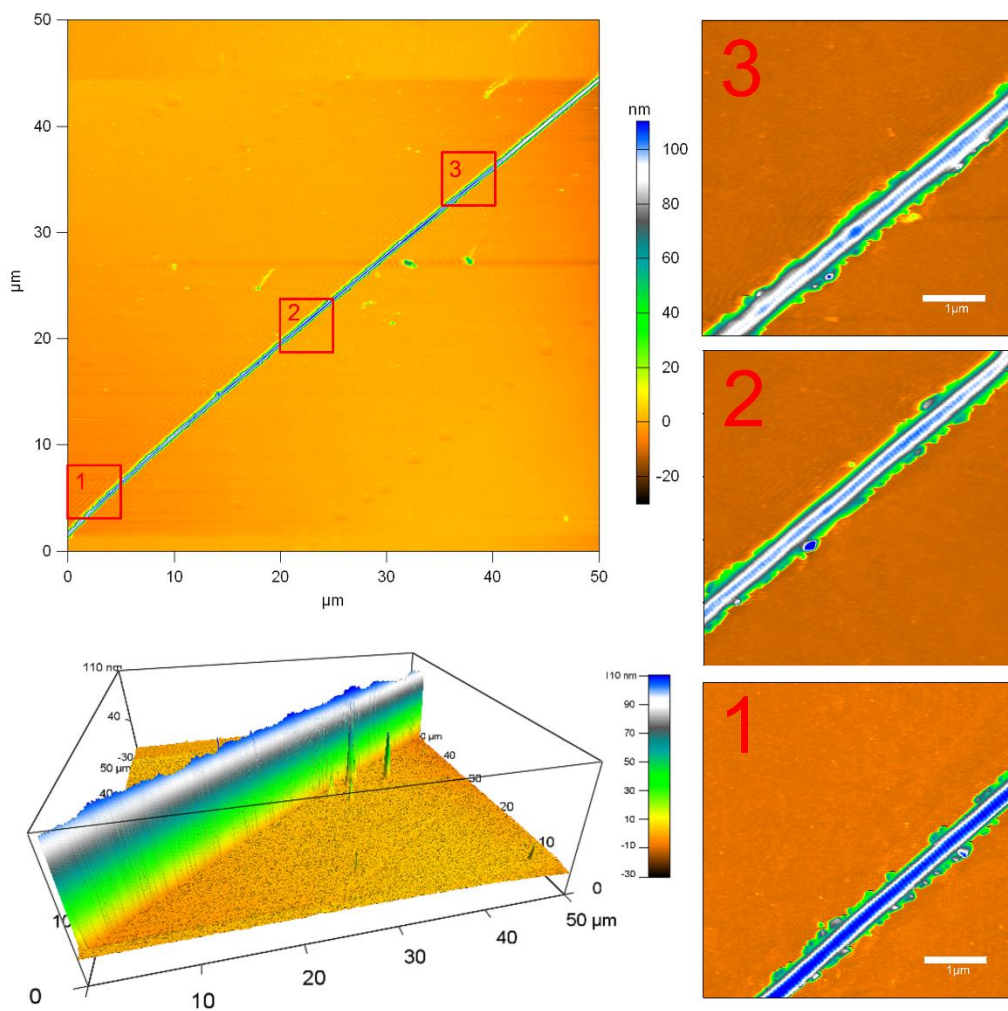

Figure B AFM scan of 75 $\mu\text{m}$  section of fiber.

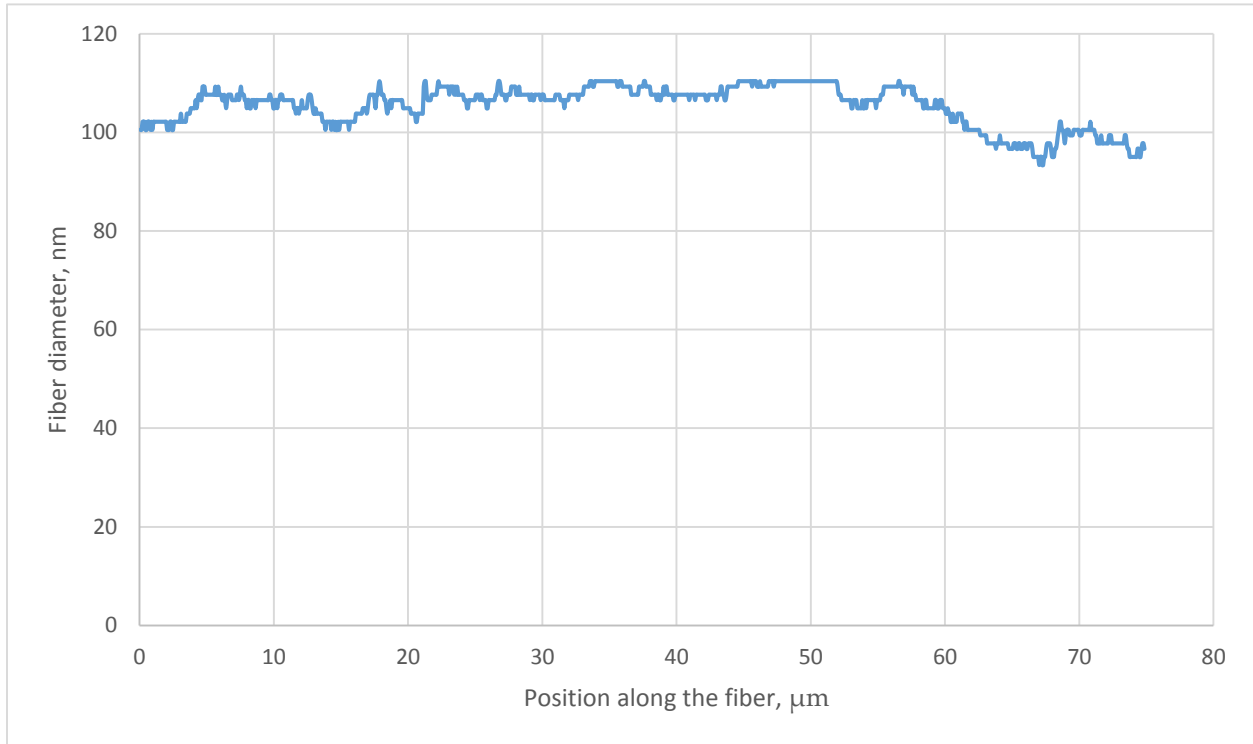

**Figure C Diameter of the fiber.**

The projection of the maximum height on the XZ plane is shown on Figure C. The fiber diameter is  $105.4 \pm 4.2$  nm.
