# Supplementary material for: Measurement of Elastic Modulus of Collagen Type I Single Fiber
Source: PubMed Central journal article supplement (PMC4723153; doi:10.1371/journal.pone.0145711), 2016-01-22
Supplement: pone.0145711.s003.pdf [file pone.0145711.s003.pdf]

### S3 Details on fiber radius measurement with AFM

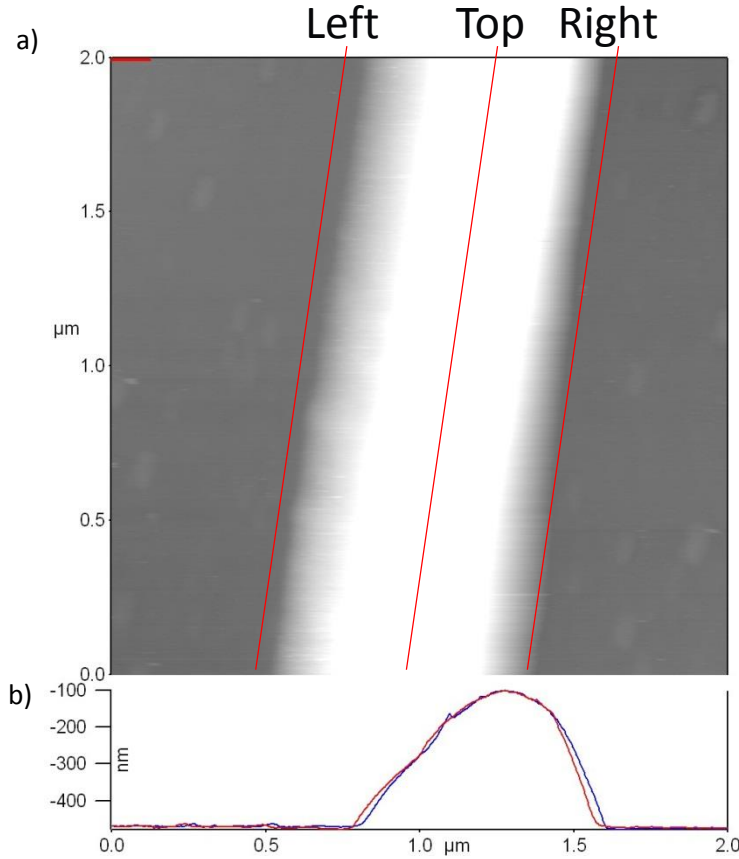

**Figure D** AFM scan of a fiber. a): ‘Left’, ‘Top’ and ‘Right’ are cross-sections used for calculation of the mean diameter. D-period is not visible only due to scale. b): Cross-section profile. The red and blue lines correspond to Height Trace and Height Retrace, respectively.

To calculate the diameter of the fiber we use the following formula:

$$Fibril\ diameter = Top\ Height(l) - \frac{Left\ Height(l) + Right\ Height(l)}{2} \quad \text{Eq. H}$$

Here  $l$  is the coordinate along the fiber.

Additional way of checking the AFM settings is performing a deconvolution of the profile shape using the geometry of AFM tip (Figure E).

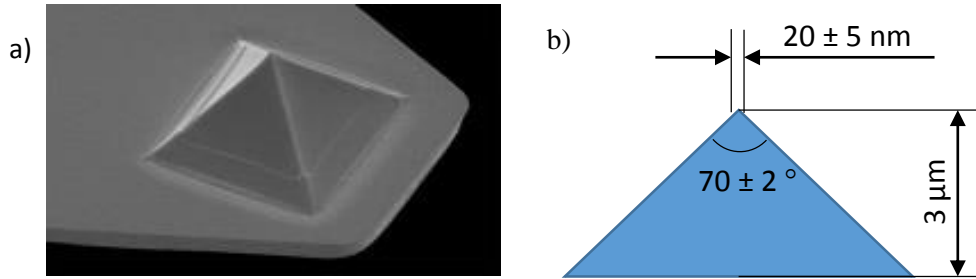

Figure E Olympus TR400PSA AFM tip geometry (a) and dimensions (b). (Data from <http://www.asylumresearch.com/ProbeStore>)

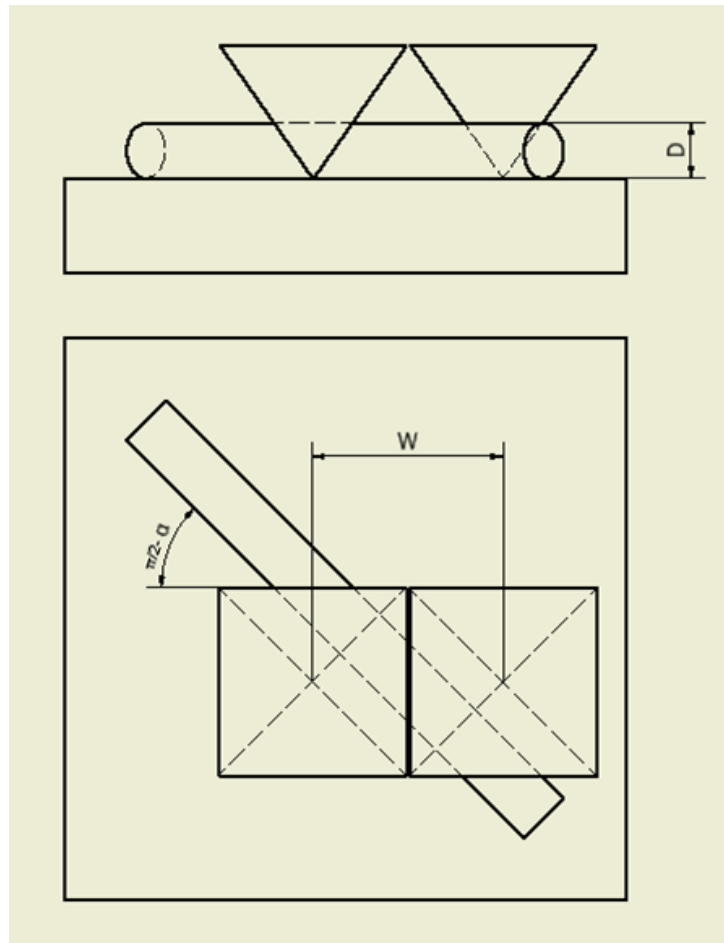

Figure F To AFM scan profile deconvolution

Based on simple geometrical model we derived the theoretical dependence of a relation between width ( $H$ ) and height ( $D$ ) of the cross-section profile (Figure D, b) on the angle between the fiber and horizontal axis  $\alpha$  :

$$\frac{W}{D} = \frac{1}{\cos \alpha} \frac{1}{\tan \left( \frac{(\pi/2) - \tan^{-1} \left( \frac{\tan(7\pi/35) \cdot (\sin \alpha + \cos \alpha)}{2} \right)}{2} \right)} \quad \text{Eq. I}$$

For vertical fiber ( $\alpha = 0$ ) the ratio is  $W/D = 1.921$ .
